# Supplementary material for: The USDA-ARS Ag100Pest Initiative: High-Quality Genome Assemblies for Agricultural Pest Arthropod Research
Source: MDPI journal article supplement (doi:10.3390/insects12070626), 2021-07-09
Supplement: s1 [file s1]

**Table S1.** Data types generated by the Ag100Pest project and their repositories.

| Data Type                                   | Repositories                                                                                                                                                                                                     | Data submission notes                                                                                                                                                                                                                                                 |
|---------------------------------------------|------------------------------------------------------------------------------------------------------------------------------------------------------------------------------------------------------------------|-----------------------------------------------------------------------------------------------------------------------------------------------------------------------------------------------------------------------------------------------------------------------|
| Project                                     | NCBI BioProject<br>( <a href="https://www.ncbi.nlm.nih.gov/bioproject/">https://www.ncbi.nlm.nih.gov/bioproject/</a> ), i5k Workspace@NAL<br>( <a href="http://i5k.nal.usda.gov/">http://i5k.nal.usda.gov/</a> ) | Ag100Pest Umbrella BioProject: PRJNA555319                                                                                                                                                                                                                            |
| Physical Sample                             | National repositories, for example GGBN/GBIF                                                                                                                                                                     | It is our intention to provide vouchers and exemplars as available to the Smithsonian Global Genome Initiative (GGI, <a href="https://naturalhistory.si.edu/research/global-genome-initiative">https://naturalhistory.si.edu/research/global-genome-initiative</a> ). |
| Sample metadata                             | NCBI BioSample<br>( <a href="https://www.ncbi.nlm.nih.gov/biosample/">https://www.ncbi.nlm.nih.gov/biosample/</a> ), i5k Workspace@NAL<br>( <a href="https://i5k.nal.usda.gov/">https://i5k.nal.usda.gov/</a> )  | All Ag100Pest BioSamples use the Invertebrate 1.0 Sample package ( <a href="https://www.ncbi.nlm.nih.gov/biosample/docs/packages/Invertebrate.1.0/">https://www.ncbi.nlm.nih.gov/biosample/docs/packages/Invertebrate.1.0/</a> )                                      |
| DNA and RNA high-throughput sequencing data | NCBI SRA<br>( <a href="http://www.ncbi.nlm.nih.gov/sra">http://www.ncbi.nlm.nih.gov/sra</a> )                                                                                                                    | NA                                                                                                                                                                                                                                                                    |
| Genome assembly                             | NCBI assembly<br>( <a href="https://www.ncbi.nlm.nih.gov/assembly/">https://www.ncbi.nlm.nih.gov/assembly/</a> ), i5k Workspace@NAL                                                                              | NA                                                                                                                                                                                                                                                                    |
| Gene structural annotations                 | NCBI RefSeq<br>( <a href="https://www.ncbi.nlm.nih.gov/refseq/">https://www.ncbi.nlm.nih.gov/refseq/</a> ), i5k Workspace@NAL<br>( <a href="https://i5k.nal.usda.gov/">https://i5k.nal.usda.gov/</a> )           | The NCBI RefSeq eukaryotic annotation pipeline generates gene structural annotations.                                                                                                                                                                                 |
| Protein functional annotations              | i5k Workspace@NAL<br>( <a href="https://i5k.nal.usda.gov/">https://i5k.nal.usda.gov/</a> )                                                                                                                       | The AgBase functional annotation workflow is used to generate protein functional annotations.                                                                                                                                                                         |
| Gene manual annotations                     | i5k Workspace@NAL<br>( <a href="https://i5k.nal.usda.gov/">https://i5k.nal.usda.gov/</a> ), NCBI GenBank<br>( <a href="https://www.ncbi.nlm.nih.gov/genbank/">https://www.ncbi.nlm.nih.gov/genbank/</a> )        | Community curators at the i5k Workspace@NAL using the Apollo software perform gene manual annotations.                                                                                                                                                                |

**Table S2.** Ag100Pest assembly metrics. Table of assembly size and contig N50 for data presented in Figure 3. Data includes 47 species over 7 orders for which Ag100Pest has completed HiFi sequencing and contig assemblies.

| Species                              | Order       | Assembly Length (Mbp) | Contig N50 (Mbp) |
|--------------------------------------|-------------|-----------------------|------------------|
| <i>Anthonomus grandis grandis</i>    | Coleoptera  | 862.04                | 4.42             |
| <i>Anthonomus grandis thurberi</i>   | Coleoptera  | 738.84                | 9.89             |
| <i>Aphthona nigricutis</i>           | Coleoptera  | 1,048.75              | 3.38             |
| <i>Curculio caryae</i>               | Coleoptera  | 2,223.01              | 4.92             |
| <i>Cylas formicarius</i>             | Coleoptera  | 394.20                | 2.97             |
| <i>Cynaues angustus</i>              | Coleoptera  | 244.95                | 11.79            |
| <i>Diabrotica undecimpunctata</i>    | Coleoptera  | 540.93                | 21.43            |
| <i>Diorhabda carinulata</i>          | Coleoptera  | 417.24                | 23.46            |
| <i>Diorhabda carinata</i>            | Coleoptera  | 448.66                | 24.53            |
| <i>Diorhabda elongata</i>            | Coleoptera  | 481.40                | 12.82            |
| <i>Diorhabda sublineata</i>          | Coleoptera  | 456.34                | 13.82            |
| <i>Gnatocerus cornutus</i>           | Coleoptera  | 342.84                | 15.45            |
| <i>Lasioderma serricorne</i>         | Coleoptera  | 231.76                | 5.19             |
| <i>Latheticus oryzae</i>             | Coleoptera  | 175.49                | 11.19            |
| <i>Oryzaephilus mercator</i>         | Coleoptera  | 144.03                | 2.52             |
| <i>Oryzaephilus surinamensis</i>     | Coleoptera  | 173.49                | 5.98             |
| <i>Trogoderma granarium</i>          | Coleoptera  | 307.73                | 9.49             |
| <i>Tribolium brevicornis</i>         | Coleoptera  | 706.82                | 9.82             |
| <i>Tribolium castaneum</i> GA-2      | Coleoptera  | 242.40                | 13.86            |
| <i>Tribolium castaneum</i> Wakefield | Coleoptera  | 272.48                | 1.19             |
| <i>Tribolium confusum</i>            | Coleoptera  | 438.46                | 11.54            |
| <i>Trogoderma variabile</i>          | Coleoptera  | 342.38                | 15.00            |
| <i>Chaetopsis massyla</i>            | Diptera     | 220.32                | 34.36            |
| <i>Euxesta stigmatias</i>            | Diptera     | 521.07                | 2.02             |
| <i>Musca autumnalis</i> female       | Diptera     | 2,306.19              | 2.53             |
| <i>Musca autumnalis</i> male         | Diptera     | 2,210.83              | 3.52             |
| <i>Stomoxys calcitrans</i>           | Diptera     | 1,159.87              | 5.56             |
| <i>Strauzia longitudinalis</i>       | Diptera     | 1,019.91              | 2.20             |
| <i>Aphis gossypii</i>                | Hemiptera   | 416.81                | 17.16            |
| <i>Anasa tristis</i>                 | Hemiptera   | 1,917.22              | 1.77             |
| <i>Bactericera maculipennis</i>      | Hemiptera   | 462.30                | 1.95             |
| Mealy Bug                            | Hemiptera   | 320.50                | 1.49             |
| <i>Diprion similis</i>               | Hymenoptera | 280.20                | 19.00            |
| <i>Neodiprion lecontei</i>           | Hymenoptera | 273.27                | 8.16             |
| <i>Neodiprion pinetum</i>            | Hymenoptera | 272.19                | 4.68             |
| <i>Neodiprion virginianus</i>        | Hymenoptera | 263.17                | 11.04            |
| <i>Neodiprion fabricii</i>           | Hymenoptera | 260.84                | 14.83            |
| <i>Vespa crabro</i>                  | Hymenoptera | 331.76                | 6.61             |
| <i>Vespa mandarina</i> female        | Hymenoptera | 329.49                | 2.59             |
| <i>Vespa mandarina</i> male          | Hymenoptera | 317.48                | 2.84             |
| <i>Vespula pensylvatica</i>          | Hymenoptera | 204.70                | 4.64             |
| <i>Wasmannia auropunctata</i>        | Hymenoptera | 320.50                | 1.49             |
| <i>Dermacentor andersoni</i>         | Ixodida     | 2,752.49              | 70.43            |
| <i>Haemaphysalis longicornis</i>     | Ixodida     | 5,576.40              | 0.88             |
| <i>Plodia interpunctella</i>         | Lepidoptera | 291.43                | 8.96             |
| <i>Sitotroga cerealella</i>          | Lepidoptera | 334.95                | 8.92             |
| <i>Schistocerca gregaria</i>         | Orthoptera  | 8,746.28              | 44.58            |
